# Supplementary material for: Different epigenetic signatures of newborn telomere length and telomere attrition rate in early life
Source: publisher site journal article supplement (doi:10.18632/aging.203117), 2021-06-04
Supplement: Supplementary file [file aging-v13i11-203117-supplementary-material-SD3.pdf]

**SUPPLEMENTARY TABLES**

**Supplementary Table 1. The summary of the pairwise Pearson correlations of the CpGs which passed pre-screening by an epigenome-wide association analysis.**

|                                                | min   | 5th percentile | Median | 95th percentile | max  |
|------------------------------------------------|-------|----------------|--------|-----------------|------|
| <b>Cord blood telomere length</b> <sup>1</sup> | -0.95 | -0.19          | 0.05   | 0.78            | 0.99 |
| <b>Telomere attrition rate</b> <sup>2</sup>    | -0.96 | -0.28          | 0.03   | 0.49            | 0.98 |

<sup>1</sup>260,296,336 pairwise Pearson correlations of 22,817 CpGs.

<sup>2</sup>48,624,591 pairwise Pearson correlations of 9,862 CpGs.

**Supplementary Table 2. The 47 CpGs and 7 interactions in the model of baseline telomere length.**

| Name of CpG or interaction | Coefficient (bootstrap p-value) | EWAS Coefficient (p-value) | Chromosome | Position on chromosome | Relation to island | Gene name              | DMR | Promoter associated |
|----------------------------|---------------------------------|----------------------------|------------|------------------------|--------------------|------------------------|-----|---------------------|
| (intercept)                | 1.1605 (0.00e+00)               |                            |            |                        |                    |                        |     |                     |
| cg00036011                 | 0.0169 (4.00e-04)               | 20.68 (9.17e-04)           | chr6       | 26271718               | N_Shore            | HIST1H3G; HIST1H2BI    |     |                     |
| cg00064950                 | -0.0135 (1.10e-03)              | -8.51 (4.32e-03)           | chr17      | 7184216                | Island             | SLC2A4                 |     |                     |
| cg00487989                 | 0.0177 (7.00e-04)               | 7.64 (7.07e-04)            | chr16      | 89688244               | OpenSea            | DPEP1                  |     |                     |
| cg00871560                 | 0.0112 (1.12e-02)               | 1.47 (2.32e-04)            | chr3       | 132756721              | N_Shore            | TMEM108                |     |                     |
| cg00973724                 | 0.0109 (1.18e-02)               | 7.43 (2.76e-03)            | chr12      | 49524797               | Island             | TUBA1B                 |     | yes                 |
| cg00973724:cg00064950      | -0.0086 (2.66e-02)              |                            |            |                        |                    | <i>TUBA1B * SLC2A4</i> |     |                     |
| cg01567315                 | 0.0156 (1.10e-03)               | 4.52 (2.60e-04)            | chr1       | 155650264              | OpenSea            | YY1AP1                 |     |                     |
| cg02576753                 | 0.0132 (4.40e-03)               | 1.56 (2.56e-06)            | chr15      | 27772640               | OpenSea            | GABRG3                 |     |                     |
| cg02802645                 | -0.0139 (5.60e-03)              | -6.17 (3.64e-03)           | chr22      | 38904757               | S_Shore            |                        |     |                     |
| cg03891344                 | -0.0193 (4.00e-04)              | -9.98 (1.25e-04)           | chr16      | 19533212               | Island             | GDE1                   |     | yes                 |
| cg04372430                 | -0.0074 (7.54e-02)              | -9.06 (6.31e-03)           | chr8       | 48591406               | OpenSea            | SPIDR                  |     |                     |
| cg04372430:cg16435922      | -0.0171 (2.00e-04)              |                            |            |                        |                    |                        |     |                     |
| cg06105699                 | 0.0162 (4.00e-04)               | 1.15 (2.53e-03)            | chr17      | 79971436               | OpenSea            | ASPSCR1                |     |                     |
| cg06529600                 | -0.0066 (1.18e-01)              | -2.15 (2.60e-03)           | chr6       | 112652308              | OpenSea            |                        |     |                     |
| cg06826039                 | -0.0099 (2.82e-02)              | -6.65 (3.07e-04)           | chr1       | 204379650              | N_Shore            | PPP1R15B               |     | yes                 |
| cg07131116                 | 0.0113 (2.57e-02)               | 9.4 (2.34e-06)             | chr14      | 94546722               | N_Shore            | DDX24; IFI27L1         |     | yes                 |
| cg07417551                 | 0.0108 (1.75e-02)               | 3.34 (3.30e-03)            | chr19      | 14586295               | S_Shore            | PTGER1                 |     |                     |
| cg08878914                 | -0.0099 (2.53e-02)              | -5.9 (4.85e-03)            | chr8       | 86435445               | OpenSea            |                        |     |                     |
| cg09793256                 | -0.0112 (9.80e-03)              | -7.08 (4.66e-04)           | chr2       | 55646604               | N_Shore            | CCDC88A                | DMR | yes                 |
| cg09880724                 | -0.0142 (1.30e-03)              | -34.01 (3.75e-03)          | chr16      | 87425644               | Island             | FBXO31; MAP1LC3B       |     | yes                 |
| cg11300971                 | 0.0143 (4.10e-03)               | 1.88 (1.33e-04)            | chr4       | 89619038               | OpenSea            | NAP1L5; HERC3          |     | yes                 |
| cg11455582                 | -0.0129 (3.90e-03)              | -8.57 (7.86e-03)           | chr3       | 155272990              | OpenSea            | PLCH1                  |     |                     |
| cg12581244                 | 0.0091 (6.35e-02)               | 4.65 (2.06e-03)            | chr17      | 33700295               | N_Shore            | SLFN11                 |     | yes                 |
| cg13074173                 | -0.0074 (7.85e-02)              | -3.27 (4.55e-03)           | chr8       | 144462007              | Island             | RHPN1                  |     |                     |
| cg13074173:cg00973724      | -0.0146 (2.20e-03)              |                            |            |                        |                    | <i>RHPN1 * TUBA1B</i>  |     |                     |
| cg14055864                 | -0.0129 (7.50e-03)              | -7.72 (3.72e-03)           | chr3       | 138067120              | Island             | MRAS                   |     |                     |
| cg14102251                 | 0.0062 (1.46e-01)               | 6.08 (7.67e-03)            | chr14      | 75745098               | Island             | FOS                    |     |                     |
| cg14102251:cg12581244      | 0.0101 (2.70e-02)               |                            |            |                        |                    | <i>FOS * SLFN11</i>    |     |                     |
| cg14264119                 | 0.0169 (0.00e+00)               | 2.37 (5.41e-05)            | chr10      | 11783794               | N_Shore            | ECHDC3                 |     |                     |
| cg14493336                 | 0.0085 (3.73e-02)               | 0.68 (5.11e-03)            | chr2       | 65295115               | OpenSea            | CEP68                  |     |                     |
| cg14493336:cg14264119      | 0.0091 (1.50e-02)               |                            |            |                        |                    | <i>CEP68 * ECHDC3</i>  |     |                     |
| cg15380694                 | 0.0125 (1.06e-02)               | 9.52 (3.49e-04)            | chr8       | 125577065              | OpenSea            | MTSS1                  |     | yes                 |
| cg15661580                 | -0.0132 (6.00e-03)              | -3.82 (1.04e-03)           | chr10      | 71896835               | OpenSea            |                        |     |                     |
| cg15821589                 | -0.0169 (2.00e-04)              | -2.89 (8.26e-06)           | chr1       | 78444904               | Island             | FUBP1                  |     |                     |
| cg16435922                 | 0.016 (6.00e-04)                | 3.84 (4.55e-05)            | chr16      | 55053053               | Island             |                        |     |                     |
| cg17282982                 | 0.0161 (0.00e+00)               | 34.56 (4.40e-05)           | chr1       | 114355064              | Island             | RSBN1                  |     | yes                 |
| cg17332573                 | 0.0126 (3.10e-03)               | 10.68 (1.22e-06)           | chr6       | 26250934               | N_Shore            | HIST1H2BH; IST1H3F     |     | yes                 |
| cg19822755                 | -0.0108 (7.60e-03)              | -1.95 (1.97e-04)           | chr16      | 30108259               | S_Shore            | YPEL3                  |     |                     |
| cg20249169                 | 0.0128 (6.60e-03)               | 10.23 (2.72e-03)           | chr2       | 64881356               | Island             | SERTAD2                |     |                     |

|                       |                    |                  |       |           |         |                         |  |     |
|-----------------------|--------------------|------------------|-------|-----------|---------|-------------------------|--|-----|
| cg20249169:cg07417551 | 0.0191 (1.00e-03)  |                  |       |           |         | <i>SERTAD2 * PTGER1</i> |  |     |
| cg20467667            | 0.0127 (6.10e-03)  | 15.65 (1.32e-06) | chr10 | 75987922  | OpenSea | ADK                     |  | yes |
| cg21954346            | 0.0126 (5.80e-03)  | 8.03 (2.26e-04)  | chr16 | 68271489  | Island  | ESRP2                   |  | yes |
| cg22069262            | -0.0095 (4.73e-02) | -3.66 (6.60e-03) | chr7  | 1587402   | Island  | TMEM184A                |  |     |
| cg22335713            | 0.0106 (1.36e-02)  | 4.78 (3.94e-04)  | chr10 | 123357603 | Island  | FGFR2                   |  |     |
| cg22335713:cg22577984 | -0.0157 (5.10e-03) |                  |       |           |         | <i>FGFR2 * C2CD2L</i>   |  |     |
| cg22577984            | -0.011 (1.83e-02)  | -2.86 (5.99e-03) | chr11 | 118981363 | S_Shelf | C2CD2L                  |  |     |
| cg22749642            | 0.012 (4.70e-03)   | 1.29 (6.78e-03)  | chr11 | 857033    | N_Shore | TSPAN4                  |  |     |
| cg23455212            | -0.0056 (2.24e-01) | -1.7 (8.00e-03)  | chr12 | 91505417  | OpenSea | LUM                     |  |     |
| cg24803876            | 0.0112 (1.07e-02)  | 12.81 (7.11e-04) | chr8  | 67340974  | Island  | RRS1                    |  |     |
| cg26035817            | -0.0115 (1.70e-02) | -1.89 (7.30e-04) | chr1  | 114414802 | OpenSea | PTPN22                  |  | yes |
| cg26110653            | -0.0139 (3.00e-04) | -6.7 (7.53e-06)  | chr13 | 38924412  | Island  | UFM1                    |  | yes |
| cg26725552            | -0.0143 (2.40e-03) | -2.77 (1.73e-03) | chr10 | 126314758 | OpenSea | FAM53B                  |  |     |
| cg26795934            | 0.0079 (1.01e-01)  | 23.3 (7.15e-06)  | chr11 | 58421700  | OpenSea |                         |  |     |
| ch.7.1140112F         | 0.0105 (3.39e-02)  | 10.2 (1.28e-05)  | chr7  | 49032475  | OpenSea |                         |  |     |

From left to right column: names of the CpGs or CpG-CpG interactions, coefficients (contributing weights) of each CpG in the final model with bootstrap p-value, the fully adjusted association and corrected p-value obtained in epigenome-wide association analysis (EWAS), the chromosome where the CpGs were located and the genes to which the CpGs were mapped. Gene names of interaction terms (two gene names in italic and separated by “\*”) indicate that both interacting CpGs were annotated with gene names.

**Supplementary Table 3. The 31 CpGs and 5 interactions in the model of telomere attrition rate.**

| Name of CpG or interaction | Coefficient (bootstrap p-value) | EWAS Coefficient (p-value) | Chromosome | Position on chromosome | Relation to island | Gene name           | DMR | Promoter associated |
|----------------------------|---------------------------------|----------------------------|------------|------------------------|--------------------|---------------------|-----|---------------------|
| (intercept)                | 8e-04 (4.62e-01)                |                            |            |                        |                    |                     |     |                     |
| cg02537587                 | 0.002 (1.90e-03)                | 1.24 (3.32e-05)            | chr12      | 3982809                | S_Shore            | PARP11              |     | yes                 |
| cg02690648                 | 0.0024 (1.00e-04)               | 1.93 (1.49e-06)            | chr8       | 10683044               | OpenSea            | PINX1; MIR1322      |     |                     |
| cg04043642                 | -0.0024 (4.00e-04)              | -0.17 (6.00e-03)           | chr20      | 55842871               | S_Shore            | BMP7                |     |                     |
| cg04935434                 | 0.0021 (2.10e-03)               | 1.12 (3.83e-03)            | chr2       | 177024947              | Island             |                     |     |                     |
| cg05201958                 | 0.002 (7.00e-04)                | 0.14 (1.34e-03)            | chr10      | 61968731               | OpenSea            | ANK3                |     |                     |
| cg06107116                 | 0.0019 (1.00e-03)               | 1.31 (6.96e-05)            | chr6       | 33267515               | Island             | TAPBP; RGL2         |     | yes                 |
| cg08134068                 | -0.0022 (3.00e-04)              | -1.37 (9.09e-03)           | chr7       | 151039078              | Island             | NUB1                |     | yes                 |
| cg09366730                 | -0.0021 (1.90e-03)              | -0.2 (4.61e-06)            | chr4       | 2341370                | Island             | ZFYVE28             |     |                     |
| cg10020325                 | 0.0016 (9.90e-03)               | 0.17 (7.77e-03)            | chr2       | 220362163              | Island             | GMPPA               |     | yes                 |
| cg10020325:cg16798728      | -0.0025 (1.00e-04)              |                            |            |                        |                    | <i>GMPPA * DPP6</i> |     |                     |
| cg11086312                 | 0.002 (1.60e-03)                | 0.1 (9.34e-04)             | chr14      | 92720273               | OpenSea            |                     |     |                     |
| cg11872375                 | 0.0024 (3.00e-04)               | 0.7 (3.43e-04)             | chr12      | 124709358              | OpenSea            | ZNF664-FAM101A      |     |                     |
| cg12267637                 | 0.0018 (2.90e-03)               | 0.15 (7.96e-04)            | chr2       | 4102455                | OpenSea            |                     |     |                     |
| cg12267637:cg23423086      | -0.0017 (4.20e-03)              |                            |            |                        |                    |                     |     |                     |
| cg12782249                 | -0.0017 (4.50e-03)              | -0.07 (6.00e-04)           | chr15      | 91458455               | OpenSea            | MAN2A2              |     |                     |
| cg13960352                 | 0.0017 (3.10e-03)               | 0.59 (4.79e-06)            | chr19      | 45826863               | Island             | CKM                 |     |                     |
| cg15072796                 | 0.0015 (1.40e-02)               | 1.31 (9.86e-04)            | chr10      | 105727772              | S_Shore            | SLK                 |     |                     |
| cg16467775                 | -0.0017 (4.30e-03)              | -0.2 (7.31e-04)            | chr16      | 90085110               | Island             | DBNDD1              |     |                     |
| cg16718624                 | -0.0016 (3.70e-03)              | -3.55 (1.38e-03)           | chr3       | 77089518               | S_Shore            | ROBO2               |     |                     |
| cg16798728                 | -0.0015 (7.50e-03)              | -0.22 (7.03e-03)           | chr7       | 153984755              | OpenSea            | DPP6                |     |                     |
| cg16798728:cg15072796      | -0.0022 (3.00e-04)              |                            |            |                        |                    | <i>DPP6 * SLK</i>   |     |                     |
| cg16975599                 | 0.0017 (7.40e-03)               | 0.15 (4.88e-05)            | chr3       | 158962761              | OpenSea            | IQCJ                |     |                     |
| cg17751153                 | -0.0021 (1.00e-03)              | -0.39 (3.51e-04)           | chr5       | 447880                 | OpenSea            | EXOC3               |     | yes                 |
| cg19027504                 | 0.0025 (0.00e+00)               | 1.23 (1.39e-04)            | chr12      | 40013700               | OpenSea            | ABCD2               |     | yes                 |
| cg19291087                 | 0.002 (1.00e-03)                | 1.27 (1.67e-04)            | chr2       | 3502760                | N_Shore            | ADI1                |     |                     |
| cg19291087:cg04935434      | -0.0022 (4.00e-04)              |                            |            |                        |                    |                     |     |                     |
| cg19291087:cg16718624      | 0.0021 (5.00e-04)               |                            |            |                        |                    | <i>ADI1 * ROBO2</i> |     |                     |
| cg19887293                 | -0.0015 (8.80e-03)              | -0.2 (1.19e-03)            | chr6       | 33132693               | S_Shelf            | COL11A2             |     |                     |
| cg20054536                 | -0.0027 (7.00e-04)              | -0.27 (1.40e-05)           | chr19      | 376069                 | Island             | THEG                |     |                     |

|                   |                    |                  |       |           |         |               |             |
|-------------------|--------------------|------------------|-------|-----------|---------|---------------|-------------|
| <b>cg23155965</b> | 0.0021 (5.00e-04)  | 0.11 (2.70e-03)  | chr10 | 134778176 | N_Shore |               |             |
| <b>cg23423086</b> | 0.0017 (6.50e-03)  | 0.58 (1.24e-03)  | chr11 | 85856245  | OpenSea |               |             |
| <b>cg23965459</b> | -0.0025 (0.00e+00) | -0.52 (3.71e-04) | chr14 | 104647094 | S_Shore | <i>KIF26A</i> |             |
| <b>cg24101053</b> | 0.0021 (1.00e-03)  | 0.56 (1.03e-03)  | chr5  | 14419738  | OpenSea | <i>TRIO</i>   |             |
| <b>cg24790788</b> | -0.0015 (8.60e-03) | -0.1 (1.05e-03)  | chr3  | 145879626 | S_Shore | <i>PLOD2</i>  | <i>RDMR</i> |
| <b>cg24942922</b> | -8e-04 (1.28e-01)  | -0.17 (2.41e-04) | chr3  | 120003547 | N_Shore |               |             |
| <b>cg25615010</b> | 0.0013 (3.78e-02)  | 1.9 (7.57e-03)   | chr7  | 152456741 | Island  | <i>ACTR3B</i> | yes         |

From left to right column: names of the CpGs or CpG-CpG interactions, coefficients (contributing weights) of each CpG in the final model with bootstrap p-value, the fully adjusted association and corrected p-value obtained in epigenome-wide association analysis (EWAS), the chromosome where the CpGs were located and the genes to which the CpGs were mapped. DMR: differentially methylated region. RDMR: reprogramming-specific DMR. Gene names of interaction terms (two gene names in italic and separated by “\*”) indicate that both interacting CpGs were annotated with gene names.

**Supplementary Table 4. Comparison of characteristics of the selected with the total data in ENVIRONAGE cohort.**

|                                             |                                | <b>Selected data (N=247)</b> | <b>Total data (N=916)</b> |
|---------------------------------------------|--------------------------------|------------------------------|---------------------------|
| <b>Newborns</b>                             |                                |                              |                           |
| <i>Sex</i>                                  | Female                         | 121 (49.0%)                  | 459 (50.1%)               |
| <i>Ethnicity</i>                            | European                       | 231 (93.5%)                  | 808 (88.2%)               |
| <i>Birth weight (kg)</i>                    |                                | 3.39 ± 0.44                  | 3.39 ± 0.48               |
| <i>Gestational age (weeks)</i>              |                                | 39.24 ± 1.37                 | 39.13 ± 1.58              |
| <b>Mothers</b>                              |                                |                              |                           |
| <i>Education</i>                            | No diploma                     | 24 (9.7%)                    | 115 (12.6%)               |
|                                             | High school diploma            | 67 (27.1%)                   | 333 (36.4%)               |
|                                             | A 3-year college               | 124 (50.2%)                  | 354 (38.6%)               |
|                                             | A 4-year college or university | 32 (13.0%)                   | 114 (12.4%)               |
| <i>Smoking status</i>                       | Never smoker                   | 167(67.6%)                   | 582 (63.5%)               |
|                                             | Former smoker                  | 48 (19.4%)                   | 210 (22.9%)               |
|                                             | Smoker                         | 32 (13.0%)                   | 124 (13.5%)               |
| <i>Parity</i>                               | Primiparous                    | 129 (52.2%)                  | 503 (54.9%)               |
|                                             | Secundiparous                  | 95 (38.5%)                   | 313 (34.2%)               |
|                                             | Multiparous                    | 23 (9.3%)                    | 100 (10.9%)               |
| <i>With pregnancy complications</i>         |                                | 37 (15.0%)                   | 166 (18.1%)               |
| <i>Age at delivery (years)</i>              |                                | 30.21 ± 4.38                 | 29.29 ± 4.59              |
| <i>Pre-pregnancy BMI (kg/m<sup>2</sup>)</i> |                                | 24.28 ± 4.56                 | 24.26 ± 4.54              |
| <b>Fathers</b>                              |                                |                              |                           |
| <i>Age at the mother’s delivery (years)</i> |                                | 32.87 ± 5.60                 | 31.88 ± 5.52              |
